# Supplementary material for: Liquid phase IR detector based on the photothermal effect of reduced graphene oxide-doped liquid crystals
Source: Royal Society of Chemistry journal article supplement (doi:10.1039/d2nr06220h), 2023-01-01
Supplement: d2nr06220h2.pdf [file d2nr06220h2.pdf]

## Supplementary Information

### **Liquid phase IR detector based on photothermal effect of reduced graphene oxide doped liquid crystal**

Mohammad A. Adeshina<sup>a</sup>, Hakseon Lee<sup>a</sup>, BharathKumar Mareddi<sup>b</sup>, Daekyung Kang<sup>c</sup>, Abdulazeez M. Ogunleye<sup>a</sup>, Hyunmin Kim<sup>d</sup>, Taewan Kim<sup>c</sup>, Muhan Choi<sup>a</sup>, Hongsik Park<sup>a</sup>, and Jonghoo Park<sup>a†</sup>

<sup>a</sup> School of Electronic and Electrical Engineering, Kyungpook National University, Daegu 41566, Republic of Korea

<sup>b</sup>IMEC, Leuven, Department of Electrical Engineering, KU Leuven, Leuven 3001, Belgium

<sup>c</sup>Department of Biomedical Convergence Science and Technology, Kyungpook National University, Daegu 41566, Republic of Korea.

<sup>d</sup>Companion Diagnostics & Medical Technology Research group DGIST, Daegu 42988, Republic of Korea

<sup>e</sup>Department of Electrical Engineering and Smart Grid Research Center Jeonbuk National University, Jeonju 54896, Korea

† Corresponding author Professor Jonghoo Park E-mail: [jonghoopark@knu.ac.kr](mailto:jonghoopark@knu.ac.kr).

29

### 30 Synthesis of reduced graphene oxide

31 The reduced graphene oxide (rGO) was synthesized by reducing GO produced from the graphite powder  
32 using the modified hummers method. 2 g of graphite with a mean size of 200 mesh and purity of 99%, 2 g  
33 of sodium nitrate ( $\text{NaNO}_3$ ), and 100 ml of sulfuric acid ( $\text{H}_2\text{SO}_4$ ) with 95 weight percent (wt%) were mixed  
34 and stirred for 1 hour. Upon cooling down the solution in an ice bath, 10 g of potassium permanganate  
35 ( $\text{KMnO}_4$ ) was added and magnetically stirred until the solution turned brown. While the stirring continued,  
36 300 ml of deionized water was slowly added followed by 10 ml of hydrogen peroxide ( $\text{H}_2\text{O}_2$ ) to eliminate  
37 excess  $\text{KMnO}_4$ . Deionized (DI) water was then added and centrifuged 5 times to remove the supernatant  
38 and wash off the residuals. To make GO powder, the GO solution was dried in an oven at 80 °C for 3 hours.  
39 In the next step, 1 g of GO was dissolved in 400 ml of DI water using a sonicator bath. The GO solution  
40 was heated to 100 °C, then 10 ml of hydrazine was added and heated for 1 hour. The obtained rGO was  
41 then washed using DI water and dried in the oven at 80 °C for 3 hours. In the final step, 1 g of rGO was  
42 dissolved in 100 ml of isopropyl alcohol and mixed using a rotating mixer for 10 minutes followed by the  
43 solution ball milling for 2 hours.

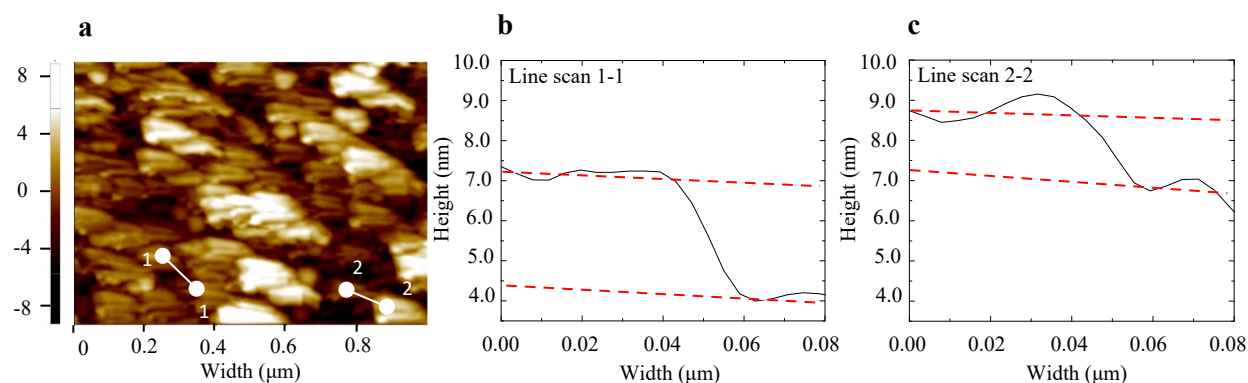

**Figure S1** a) Atomic force microscopy image of reduced graphene oxide (rGO), with the corresponding rGO line scan chart b) (1-1) showing a thickness of 2.8nm (4 layers), and c) (2-2) with a thickness of 1.4nm (2 layers).

### 44 Atomic force microscopy measurement of rGO

45 The rGO thickness was measured using atomic force microscopy depicted in **Figure S1**. The measured  
 46 thickness of 2.8 and 1.52 nm observed with line scans 1-1 and 2-2 represent 4 and 2 layers of rGO  
 47 respectively. The thickness of a reduced graphene oxide is reported to be between 0.5 and 0.7 nm.<sup>1-3</sup>

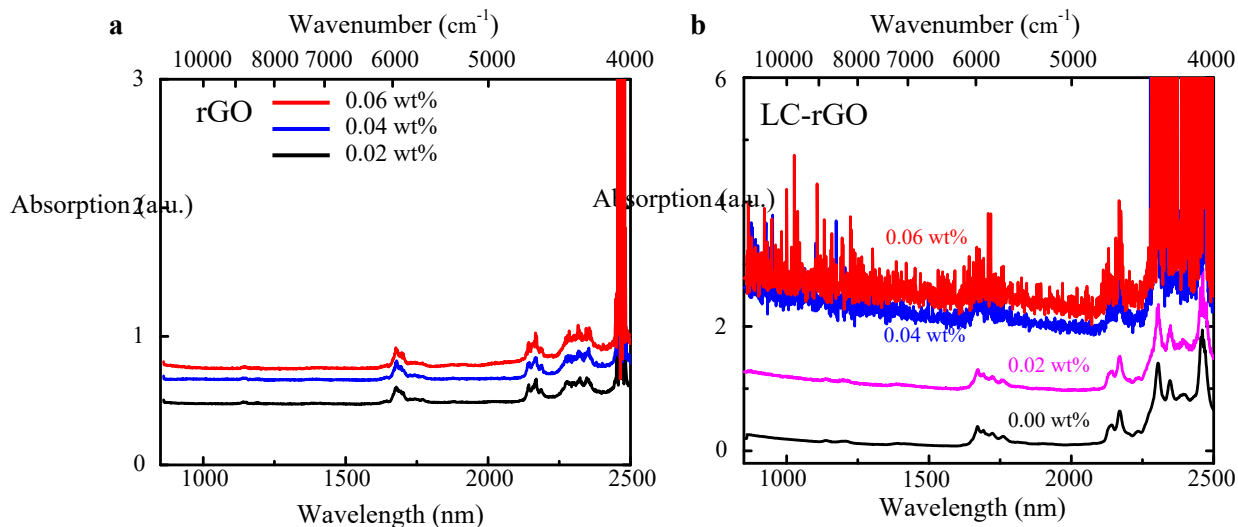

**Figure S2.** IR absorption spectra of a) reduced graphene oxide (rGO) with different weight concentration in toluene and b) 5CB nematic liquid crystal (LC)-rGO with different rGO doping concentration.

#### 48 IR absorption of rGO, pure LC and LC-rGO

49 **Figure S2a** shows the IR absorption spectra of rGO with different weight percents dissolved in toluene.  
 50 Aside from having IR absorption peaks similar to pure LC, it demonstrates an increase in absorption peak  
 51 with increase in concentration. **Figure S2b** shows the IR absorption spectra of the pure liquid crystal (LC)  
 52 and LC-rGO with different rGO doping concentration. As the doping concentration increases, the IR  
 53 absorption in the entire wavelength range increases. LC-rGO with doping concentration of 0.06 wt%  
 54 exhibits significant IR absorption enhancement in the range of 2200-2500 nm.

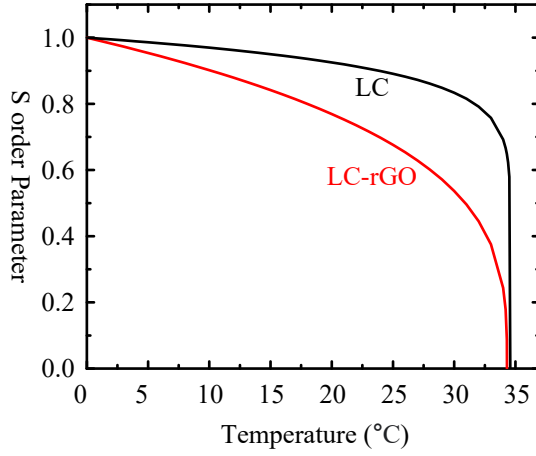

**Figure S3.** Order parameter of pure liquid crystal (LC) and LC-reduced graphene oxide (rGO) with beta ( $\beta$ ) value of 0.09 and 0.3, respectively.

#### 55 **Orientational order parameter of the pure LC and LC-rGO**

56 **Figure S3** shows the order parameter as a function of temperature for pure LC and LC-rGO calculated  
 57 based on the Haller's empirical expression<sup>4</sup> stated in equation (1). The beta ( $\beta$ ) value of 0.09 and 0.3 were  
 58 assigned for the pure LC and LC-rGO, respectively, to resemble the differential scanning calorimetry (DSC)  
 59 characteristics shown in **Figure S4**. The LC-rGO shows a higher rate of change in order parameter in the  
 60 temperature range for nematic phase.<sup>5</sup>

$$S = \left(1 - \frac{T}{T_{NI}}\right)^{\beta}, \quad (1)$$

61 where the  $T$  and  $T_{NI}$  are LC temperature and nematic to isotropic transition temperature, respectively, and  $\beta$   
 62 is a unitless fitting parameter.

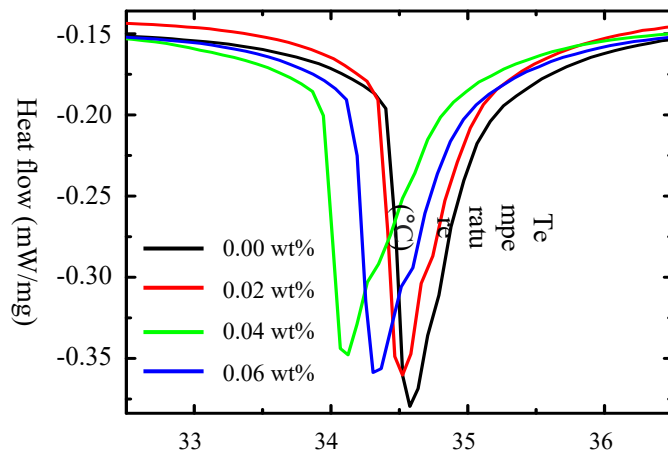

**Figure S4.** DSC data of pure liquid crystal (LC) and LC-reduced graphene oxide (rGO) with different rGO concentration.

### 63 DSC measurement of pure LC and LC-rGO

64 **Figure S4** shows the differential scanning calorimetry (DSC) results for the pure LC and LC-rGO with  
 65 different doping concentrations. Doping rGO results in decreased phase transition temperature and different  
 66 slope of heat flow with respect to the temperature. The phase transition temperature of the pure LC, 0.02  
 67 wt% LC-rGO, 0.04 wt% LC-rGO, and 0.06 wt% LC-rGO were 34.58 °C, 34.52 °C, 34.12 °C, and 34.13  
 68 °C, respectively.

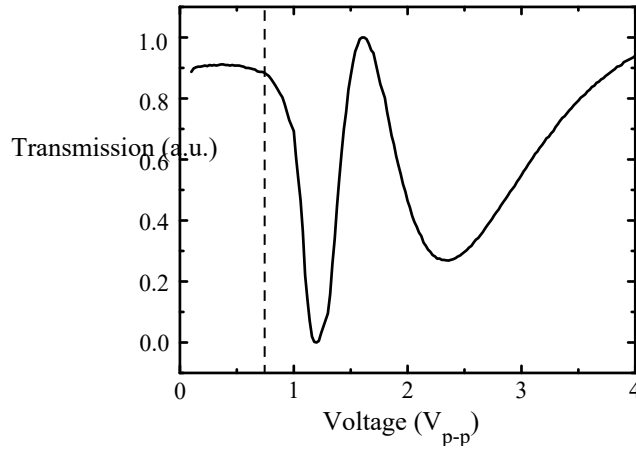

**Figure S5.** Voltage dependent transmission of 0.06 wt% liquid crystal (LC)-reduced graphene oxide (rGO) cell.

#### 69 Voltage dependent optical transmission of LC-rGO

70 **Figure S5** shows the voltage dependent transmission of the 0.06 wt% LC-rGO cell. The optical  
 71 transmission oscillates between minimum and maximum value as a function of the applied voltage higher  
 72 than the threshold voltage of 750 mV<sub>p-p</sub>. The surface anchoring energy is minimized close to this voltage.  
 73 Because of this, LC molecules are easily reoriented as the temperature increases induced by the  
 74 photothermal effect of the rGO. The measurement setup was described in a previous study.<sup>6</sup>

#### 75 Correlation between the intensity and temperature

76 In **Figure 4b**, the following mathematical relationships in equation (2)-(4) were utilized to transform the  
 77 intensity modulation to temperature modulation.

$$I = 151 - \alpha t, \quad (2)$$

$$T = 26.4 + \beta t, \quad (3)$$

$$\Delta T = \beta \left[ \frac{\Delta I}{\alpha} \right], \quad (4)$$

78 where  $I$  and  $\Delta I$  are intensity and change in intensity, respectively.  $T$  and  $\Delta T$  are temperature and change in  
79 temperature, respectively.  $t$  is time,  $\alpha$  and  $\beta$  are slopes of intensity and temperature, respectively. The slope  
80 of the intensity ( $\alpha = -4.73$ ) and temperature ( $\beta = 0.15$ ) as a function of time were obtained by linear fitting  
81 of the data for the first 10s in Figure 2d.

## 82 References.

- 83 1 L. Rui, J. Liu, J. Li, Y. Weng, Y. Dou, B. Yuan, K. Yang and Y. Ma, *Biochim. Biophys. Acta (BBA)-*  
84 *Biomembranes*, 2015, **1848**, 1203–1211.
- 85 2 P. Solís-Fernández, J. I. Paredes, S. Villar-Rodil, A. Martínez-Alonso and J. M. D. Tascón, *Carbon*  
86 *N. Y.*, 2010, **48**, 2657–2660.
- 87 3 X. Jiao, Y. Qiu, L. Zhang and X. Zhang, *RSC Adv.*, 2017, **7**, 52337–52344.
- 88 4 I. Haller, *THERMODYNAMIC AND STATIC PROPERTIES OF LIQUID CRYSTALS*, Pergamon  
89 Press, 1975, vol. 10.
- 90 5 T. M. Alam and C. J. Pearce, *Chem. Phys. Lett.*, 2014, **592**, 7–13.
- 91 6 M. B. Kumar, D. Kang, J. Jung, H. Park, J. Hahn, M. Choi, J. H. Bae, H. Kim and J. Park, *Opt. Lasers*  
92 *Eng.*, 2020, **128**, 106006.

93
